# Supplementary material
Source: Springer Nature journal article supplement (https://www.springermedizin.de/resource/supplementary/12955_2006_352_MOESM1_ESM.pdf/9560212)

Dolan (EQ5D)

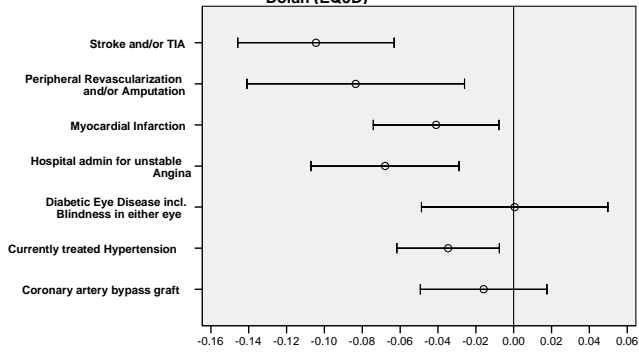

Shaw (EQ5D)

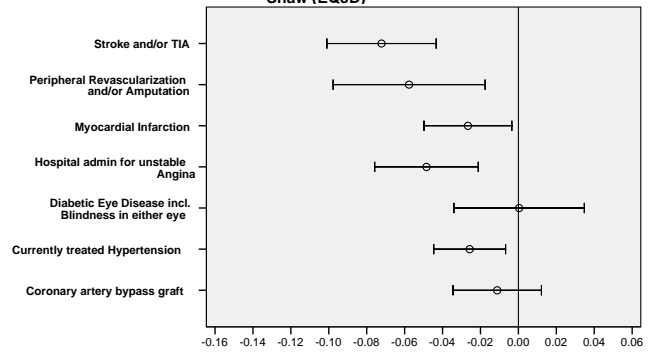

Brazier SF6D (SF12)

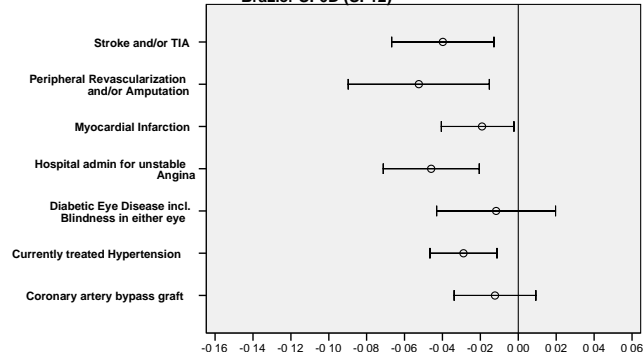

Brazier SF6D (SF36)

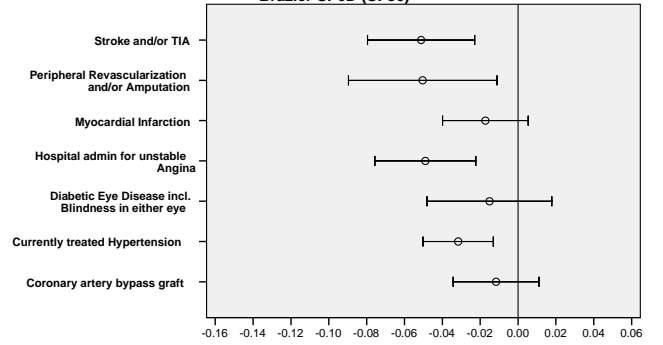

Lundberg

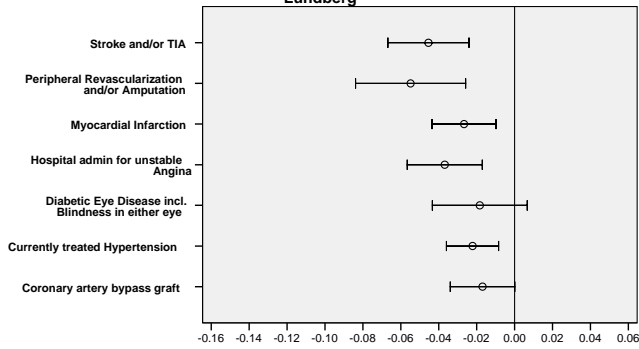

Lawrence

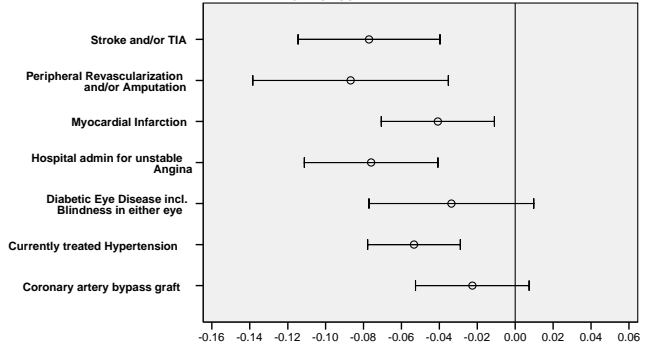

Franks (MEPS)

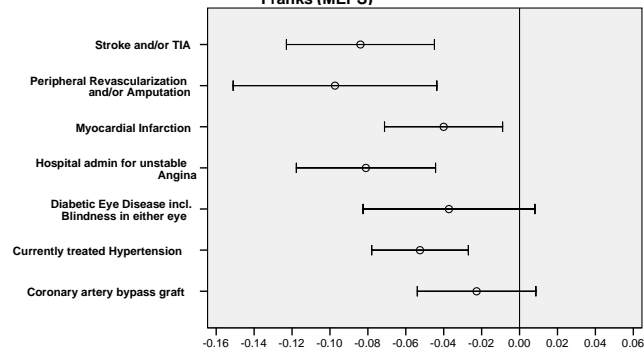

Franks

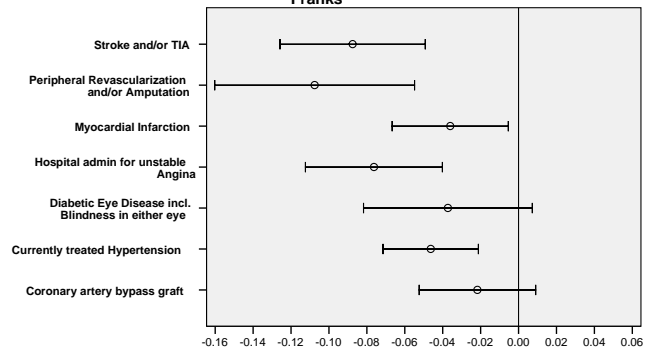

Fryback

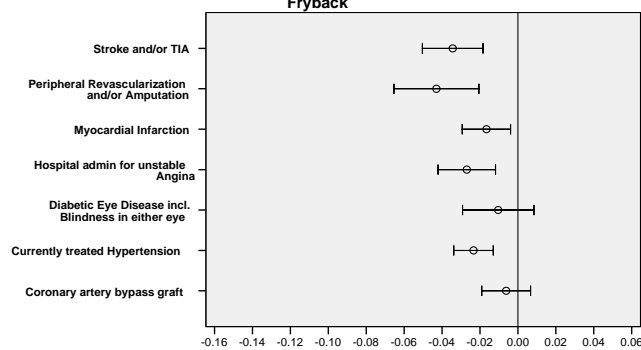

Supplement: MOESM1 [file 9560212]
